# Supplementary material for: SnS2 decorated biochar: a robust platform for the photocatalytic degradation and electrochemical sensing of pollutants
Source: Royal Society of Chemistry journal article supplement (doi:10.1039/d4nj00231h), 2024-01-01
Supplement: d4nj00231h1.pdf [file d4nj00231h1.pdf]

## Electronic Supplementary Information File

### **SnS<sub>2</sub> decorated biochar: a robust platform for the photocatalysis and electrochemical sensing of pollutants**

*Firdous Ahmad Ganaie, Zia ul-Haq, Arshid Bashir, Aaliya Qureashi, Irfan Nazir., kaniz Fatima, Altaf Hussain Pandith\*, Mohsin Ahmad Bhat*

*Laboratory of Nanoscience and Quantum Computations, Department of Chemistry, University of Kashmir, Hazratbal, Srinagar, J&K, India*

*\*Corresponding Author:*

**(Prof. Altaf Hussain Pandith)**

Department of Chemistry

University of Kashmir

**Srinagar-190006**

**India**

Phone: +91-194-2424900(OFFICE)

+91-7006429021 (Mobile)

Fax: +91-194-2414049

E-mail: [altafpandit23@gmail.com](mailto:altafpandit23@gmail.com)

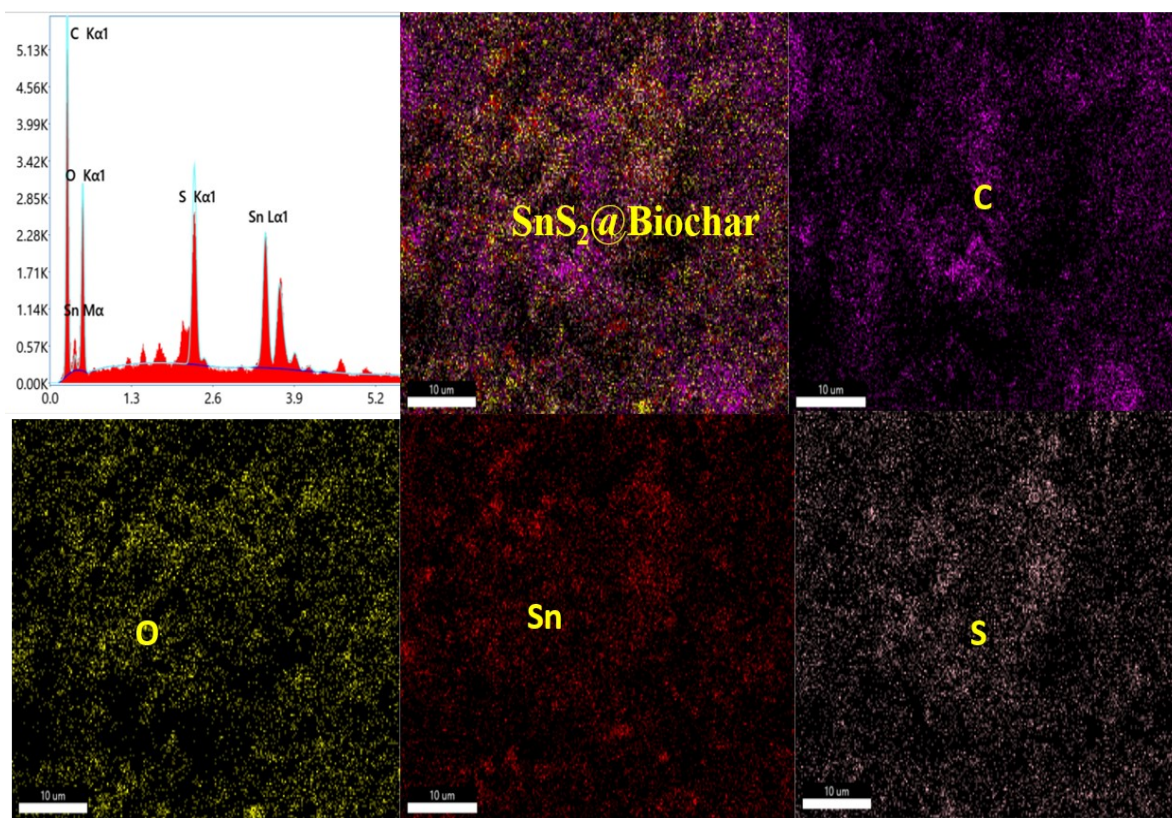

**Fig.S1** EDX spectra and elemental mapping of  $\text{SnS}_2@\text{BC}$

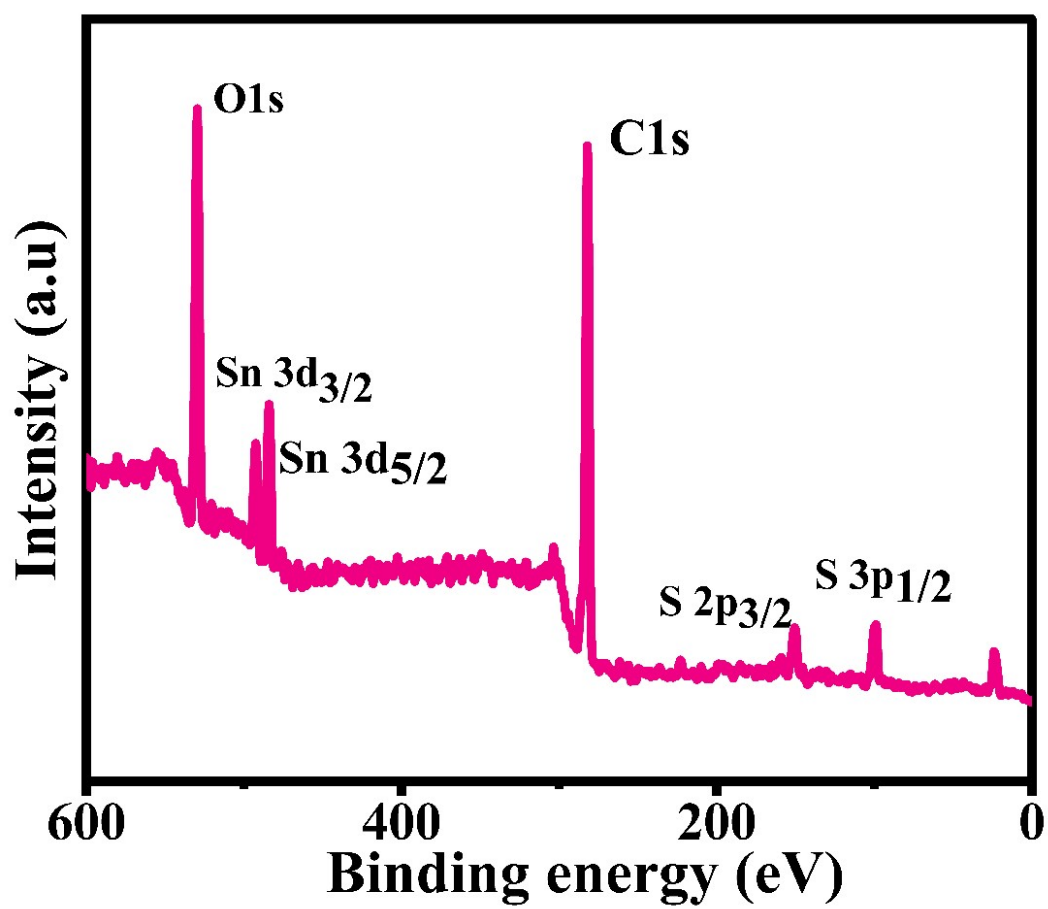

**Fig.S2** XPS surface scan of SnS<sub>2</sub>@BC

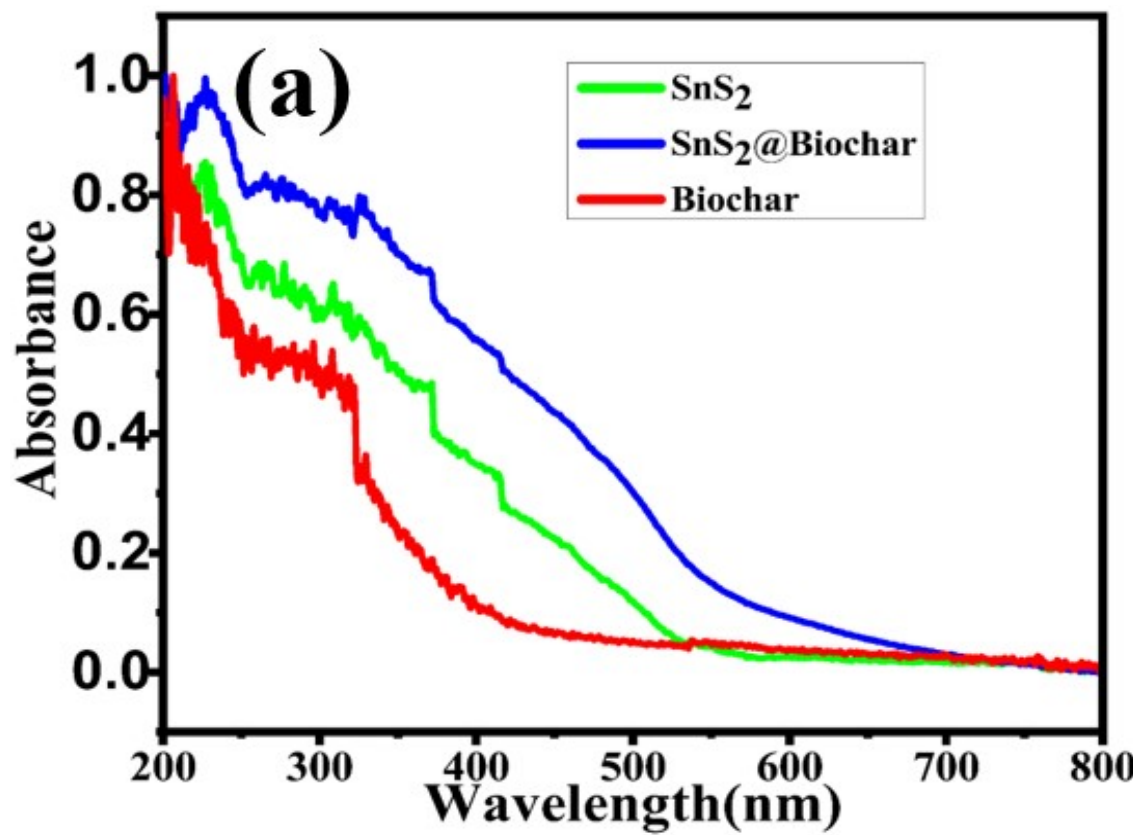

Fig.S3 Absorption trace of SnS<sub>2</sub>,Biochar and SnS<sub>2</sub>@BC

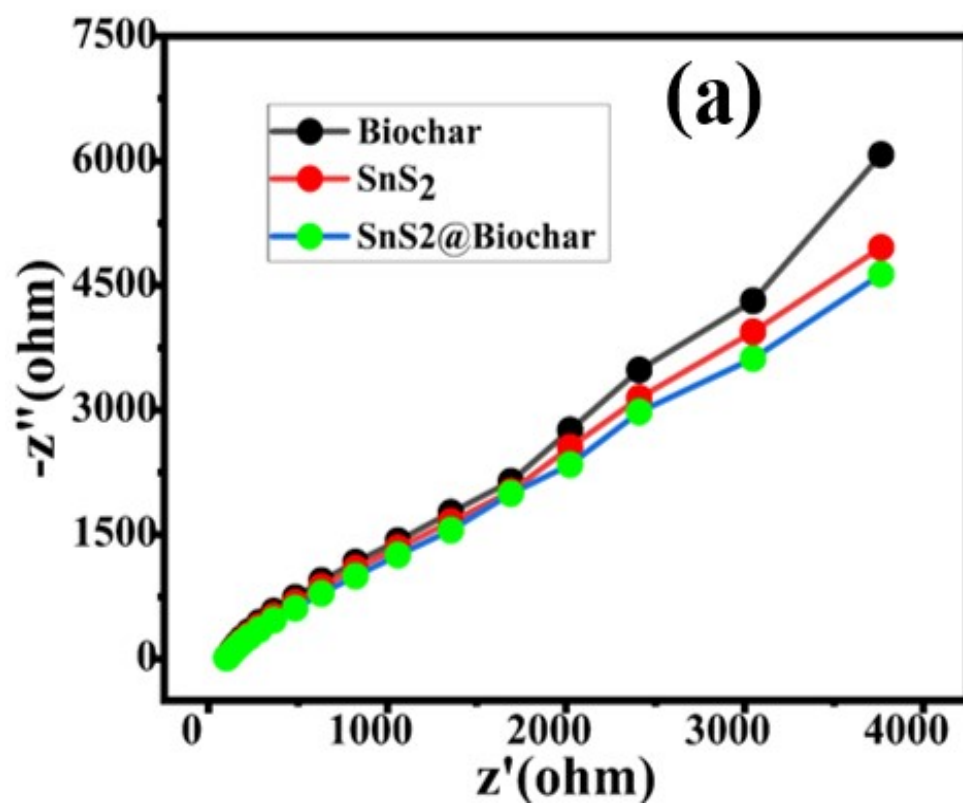

Fig.S4 Nyquist plot for biochar, SnS<sub>2</sub>, SnS<sub>2</sub>@BC

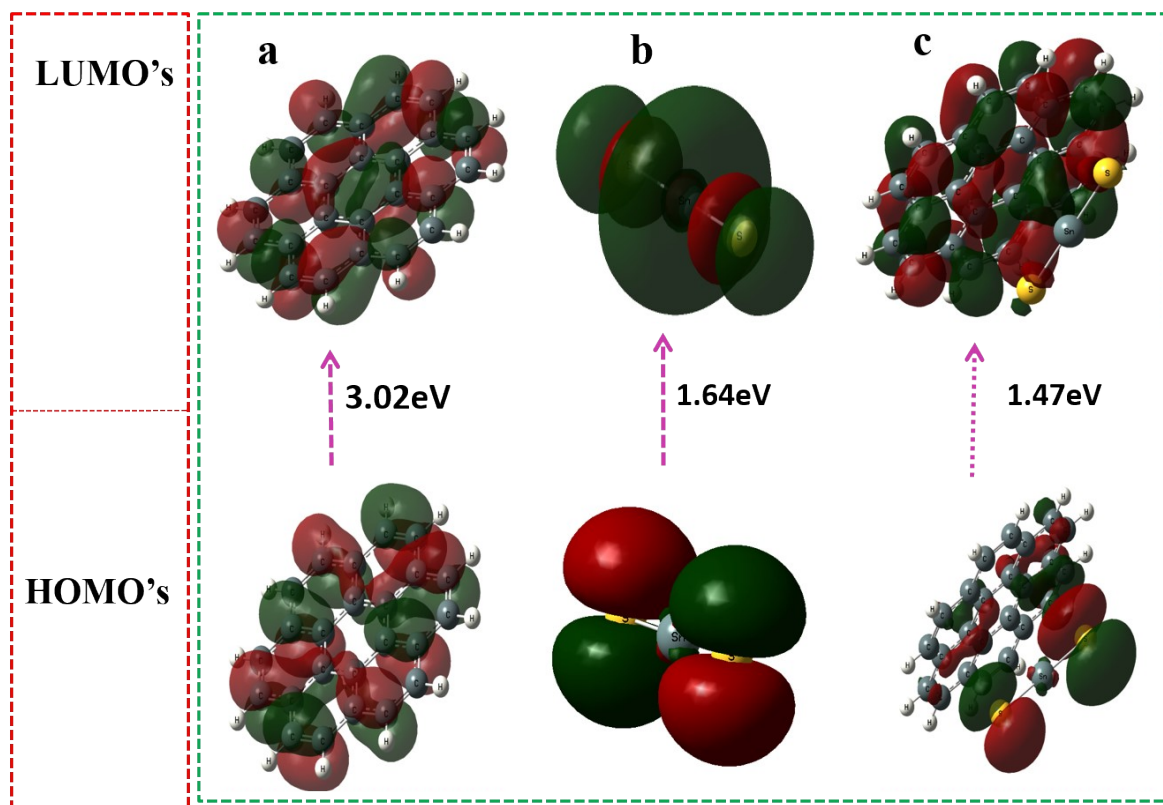

**Fig.S5** HOMO-LUMO energy gap for biochar, SnS<sub>2</sub>, SnS<sub>2</sub>@BC

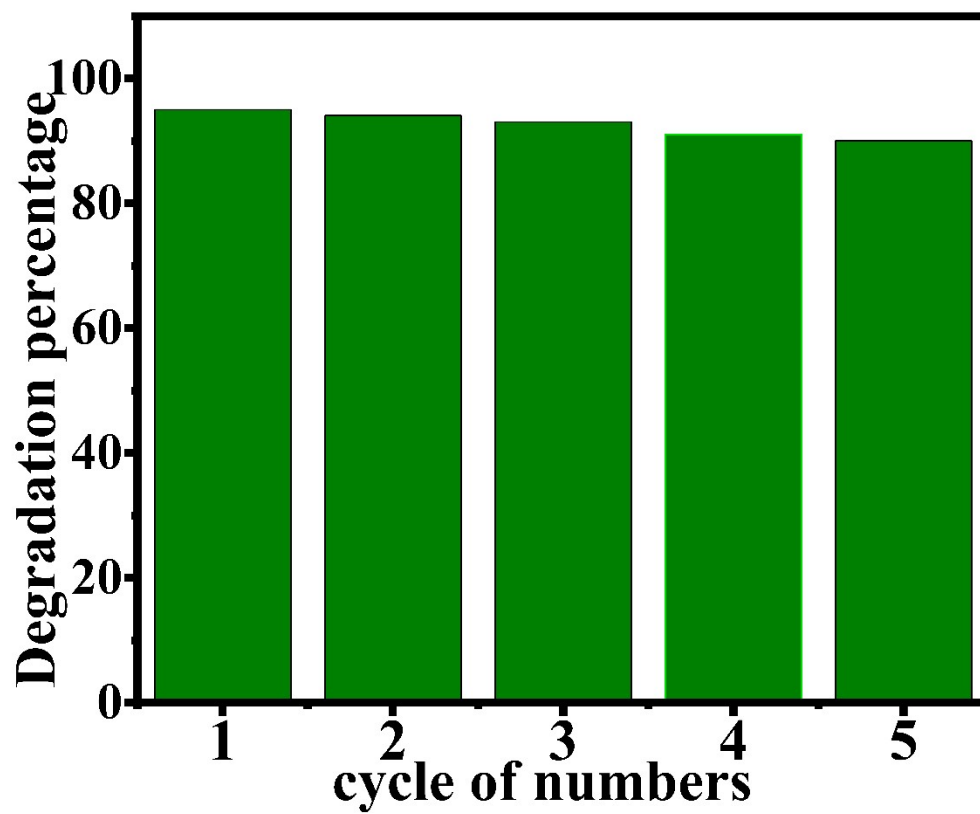

**Fig.S6** Recycled photodegradation of MB over SnS<sub>2</sub>@BC photocatalyst under the optimized conditions.

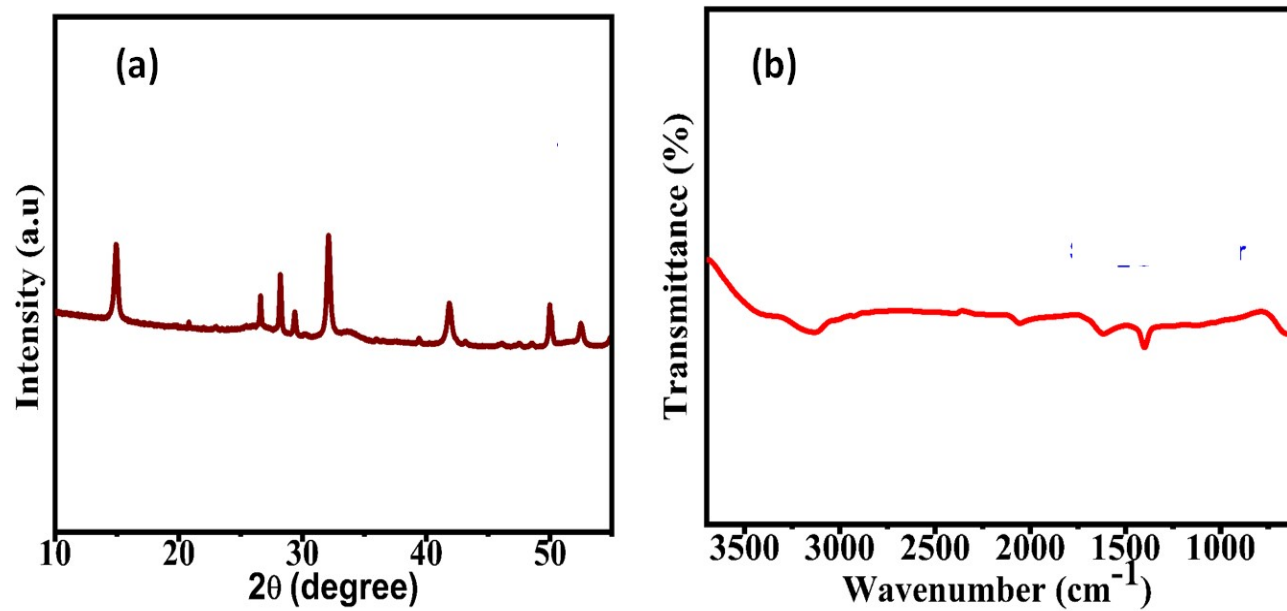

**Fig. S7** (a)XRD spectra of  $\text{SnS}_2@\text{BC}$ (b) FTIR spectra of  $\text{SnS}_2@\text{BC}$



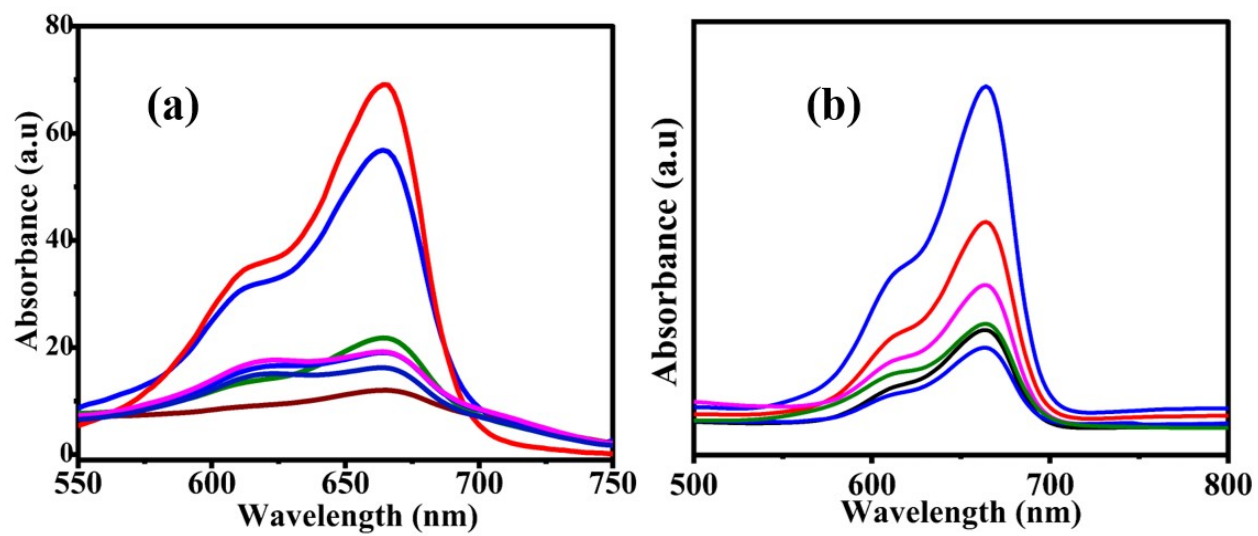

**Fig.S8:** (a) Degradation of MB in distilled water (b) degradation of MB in tap water

**Table S1: Recovery factor in the detection of  $\text{Pb}^{2+}$  and  $\text{Hg}^{2+}$**

| <b>Dal water</b> | <b><math>\text{Pb}^{2+}</math><br/>(Real)</b> | <b>Before Spiking<br/>(Unspiked)</b> | <b>After Spiking<br/>(Spiked)</b> | <b>Recovery factor(%)</b> |
|------------------|-----------------------------------------------|--------------------------------------|-----------------------------------|---------------------------|
|                  | 0.14 mA                                       | 0.205 mA                             | 0.337 mA                          | 94.2                      |
| <b>Dal water</b> | <b><math>\text{Hg}^{2+}</math><br/>(Real)</b> | <b>Before Spiking<br/>(Unspiked)</b> | <b>After Spiking<br/>(Spiked)</b> | <b>Recovery factor(%)</b> |
|                  | 0.015 mA                                      | 0.075 mA                             | 0.089 mA                          | 93.3                      |
